# Supplementary material for: Impact of morphology and oxygen vacancy content in Ni, Fe co-doped ceria for efficient electrocatalyst based water splitting
Source: Royal Society of Chemistry journal article supplement (doi:10.1039/d4na00500g), 2024-01-01
Supplement: d4na00500g1.pdf [file d4na00500g1.pdf]

Electronic Supplementary Information for

## Impact of Morphology and Oxygen Vacancy Content in Ni, Fe co-doped Ceia for Efficient Electrocatalyst Based Water Splitting

Abhaya Kumar Mishra <sup>a</sup>, Joshua Willoughby <sup>a</sup>, Shanna L. Estes <sup>b</sup>, Keliann Cleary Kohler <sup>c</sup>, Kyle S. Brinkman<sup>a\*</sup>

Author affiliation

\* Corresponding authors

<sup>a</sup> Dr. K. S. Brinkman Department of Materials Science and Engineering Clemson University Clemson, SC 29634(USA), E-mail: [ksbrink@clemson.edu](mailto:ksbrink@clemson.edu)

<sup>b</sup> Dr. S.L. Estes Department of Environmental Engineering and Earth Sciences Clemson University Anderson, SC 29625(USA), E-mail: [sestes@g.clemson.edu](mailto:sestes@g.clemson.edu)

<sup>c</sup> Keliann Cleary Kohler *Advanced* Materials Research Laboratory (AMRL) Clemson University, Anderson, SC 29625(USA), E-mail: [kelliak@clemson.edu](mailto:kelliak@clemson.edu)

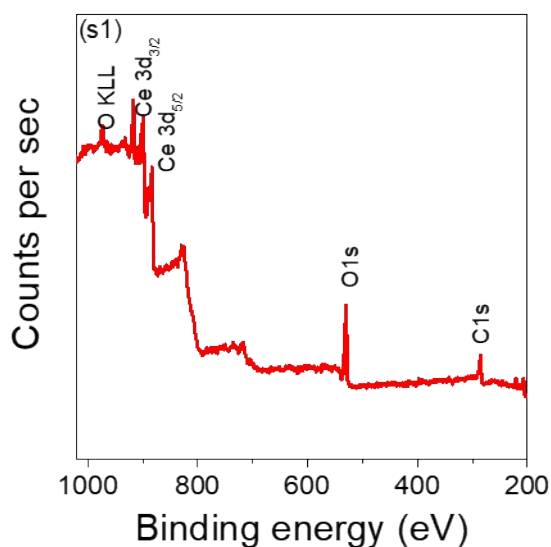

Fig.S1 survey XPS spectrum of pristine CeO<sub>2</sub> nanoplates synthesized by modified solgel method.

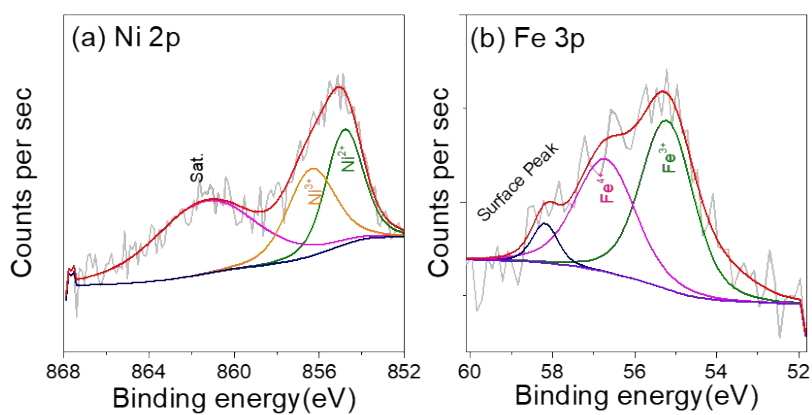

Fig.S2 Region XPS spectra of Ni + Fe co-doped CeO<sub>2</sub> (a) Ni 2p (b) Fe 3p.

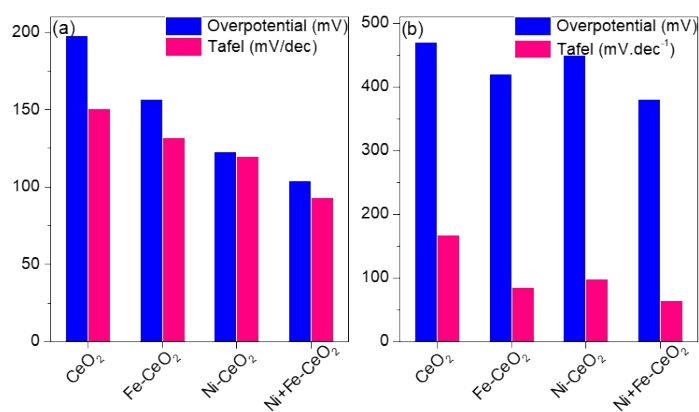

Fig.S3 Histogram for comparison of overpotential  $\eta_{10}$  and Tafel slope of the as-synthesized electrode for (a) HER and (b)OER respectively.

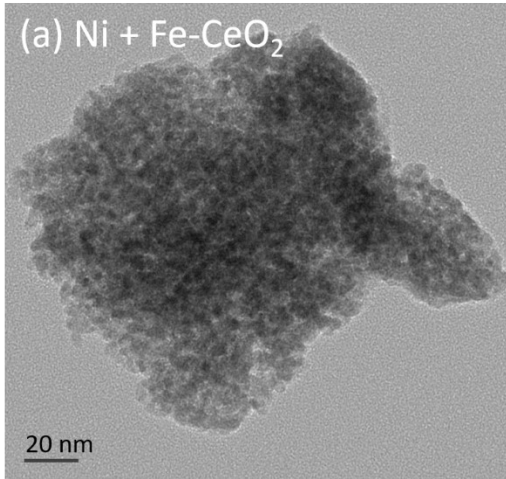

Fig S4. TEM image of Ni + Fe doped CeO<sub>2</sub> samples after HER and OER stability tests for 20 hours at 10 mA cm<sup>-2</sup> and 50 mA cm<sup>-2</sup>.

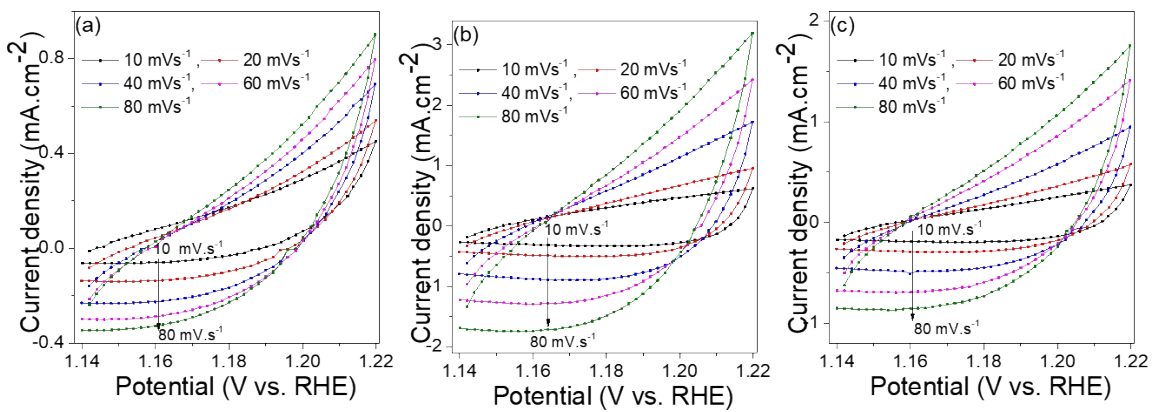

Fig.S5 Cyclic voltammograms of (a) pristine CeO<sub>2</sub> (b) 20 mol% Ni doped CeO<sub>2</sub> (C) 20% Fe doped CeO<sub>2</sub>.
